# Supplementary material
Source: PubMed Central journal article supplement (PMC4702104)
Supplement: supp_mol.115.100255_Supplemental_100255.pdf [file supp_mol.115.100255_Supplemental_100255.pdf]

SUPPLEMENTAL DATA

MOLECULAR PHARMACOLOGY

**Human CYP2C8 is a Novel Target of Peroxisome Proliferator-activated Receptor  $\alpha$   
(PPAR $\alpha$ ) in Human Liver.**

N.L. Makia and J.A. Goldstein

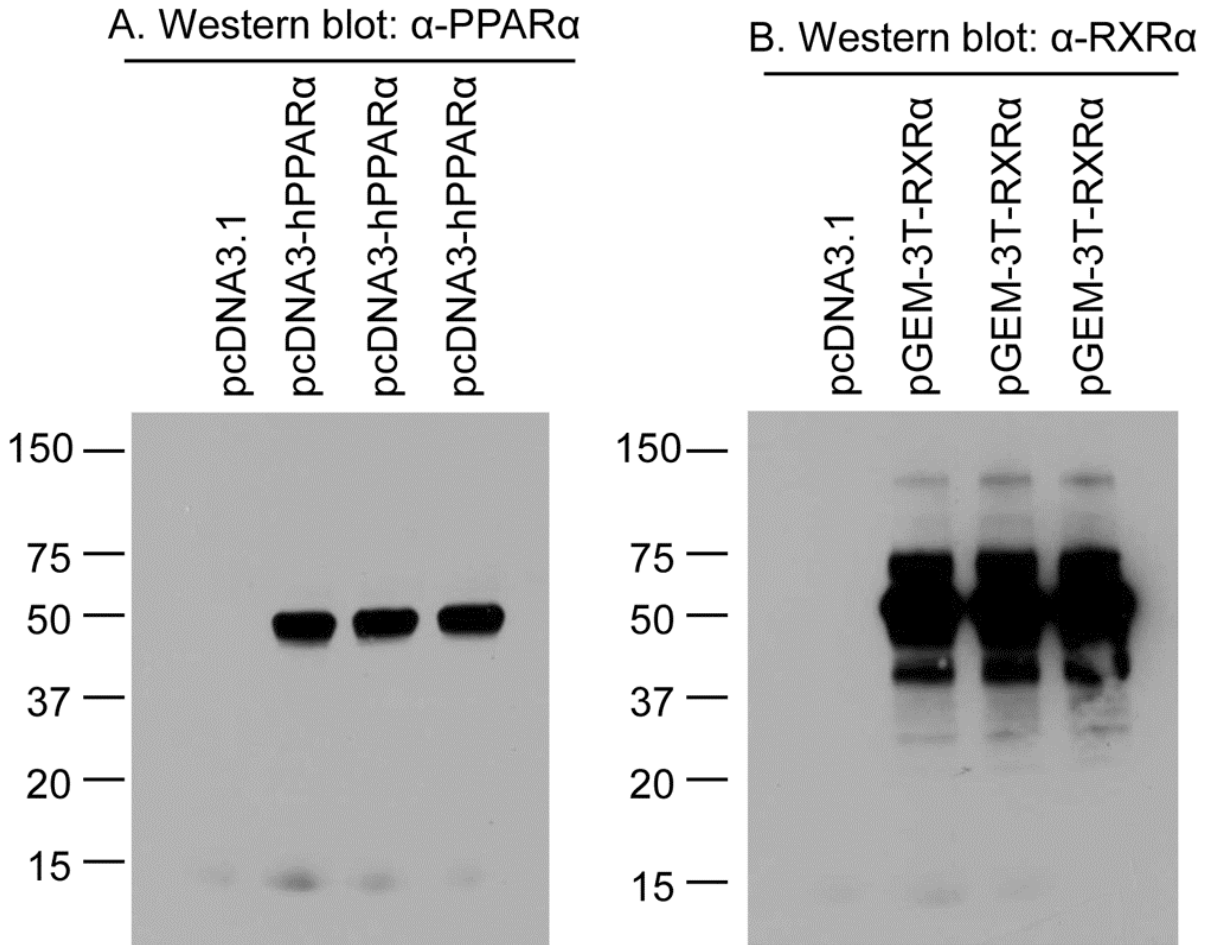

## Supplemental Figure

Supplemental Fig. The confirmation of *in vitro* transcribed/translated proteins by Western blotting. A. The human PPAR $\alpha$  protein synthesized using TNT Quick Coupled Transcription/Translation System in the presence of unlabeled methionine as described in Materials and Methods was verified by Western blot with antibody against PPAR $\alpha$  (sc-9000). B. The confirmation of translated human RXR $\alpha$  protein by Western blot with anti-RXR $\alpha$  antibody (sc-553).
